# Supplementary material for: Marked Differences in Mucosal Immune Responses Induced in Ileal versus Jejunal Peyer’s Patches to Mycobacterium avium subsp. paratuberculosis Secreted Proteins following Targeted Enteric Infection in Young Calves
Source: PubMed Central journal article supplement (PMC4936678; doi:10.1371/journal.pone.0158747), 2016-07-07
Supplement: pone.0158747.s005.pdf [file pone.0158747.s005.pdf]

**S1 Table. Recombinant *M. avium* subsp. *paratuberculosis* proteins used to evaluate immune responses.**

| <b>Protein ID</b>   | <b>Theoretical mass<br/>kDa</b> | <b>Recombinant mass<br/>kDa</b> | <b>Annotation and putative domain(s)</b> | <b>Expression Plasmid</b> |
|---------------------|---------------------------------|---------------------------------|------------------------------------------|---------------------------|
| <b>MAP0196c</b>     | 46                              | 61*                             | Septum formation                         | pET-30a                   |
| <b>MAP1569</b>      | 36                              | 57*                             | FAP                                      | pET-30a                   |
| <b>MAP0471</b>      | 28                              | 35                              | Shisa                                    | pET-30a                   |
| <b>MAP1981c</b>     | 27                              | 27                              | Nucleic acid binding                     | pET-30a                   |
| <b>MAP3634</b>      | 35                              | 38                              | Transpeptidase, heme binding, FAP        | pET-30a                   |
| <b>MAP1693c</b>     | 18                              | 18*                             | Peptidyl-prolyl cis-trans isomerase      | pET-30a                   |
| <b>MBP-MAP0281</b>  | 58                              | 61                              | Cysteine-rich secretory protein          | pMal-c4e                  |
| <b>MBP-MAP3428c</b> | 65                              | 72                              | Cutinase-like protein                    | pMal-c4e                  |
| <b>MAP2785c</b>     | 17                              | 13                              | DUF                                      | pET-30a                   |
| <b>MAP2786c</b>     | 11                              | 15                              | Rab5-binding domain                      | pET-30a                   |
| <b>MAP1718c</b>     | 15                              | 15*                             | DUF                                      | pET-30a                   |
| <b>MAP4340</b>      | 37                              | 37                              | trxC, thioredoxin 1                      | pET-28a                   |
| <b>MAP4339</b>      | 20                              | 24                              | trxB2, thioredoxin reductase             | pET-30a                   |

\* Two or more protein species observed in SDS-PAGE

FAP, fibronectin-attachment protein

Shisa, eukaryotic transcription-factor type protein

MBP, maltose-binding protein

DUF, domain of unknown function

Rab, small GTPase
